# Supplementary material for: A novel phase of superionic conductor β′-Na3PS4 with a large band gap and a low migration barrier
Source: Royal Society of Chemistry journal article supplement (doi:10.1039/d3cp02538a), 2023-01-01
Supplement: d3cp02538a1.pdf [file d3cp02538a1.pdf]

## SUPPORTING INFORMATION for:

### A Novel Phase of Superionic Conductor $\beta'$ -Na<sub>3</sub>PS<sub>4</sub> with Large Band Gap and Low Migration barrier

Xiaofeng Zhang,<sup>a</sup> Luo Yan,<sup>b</sup> Qiaoqiao Li,<sup>b</sup> Yongqi Zhang,<sup>a\*</sup> Liujiang Zhou<sup>b\*</sup>

<sup>a</sup>*Institute of Fundamental and Frontier Sciences, University of Electronic Science and Technology of China, Chengdu 611731, China.*

\*E-mail: [yqzhang@uestc.edu.cn](mailto:yqzhang@uestc.edu.cn)

<sup>b</sup>*School of Physics, University of Electronic Science and Technology of China, Chengdu 611731, China.*

\*E-mail: [ljzhou@uestc.edu.cn](mailto:ljzhou@uestc.edu.cn)

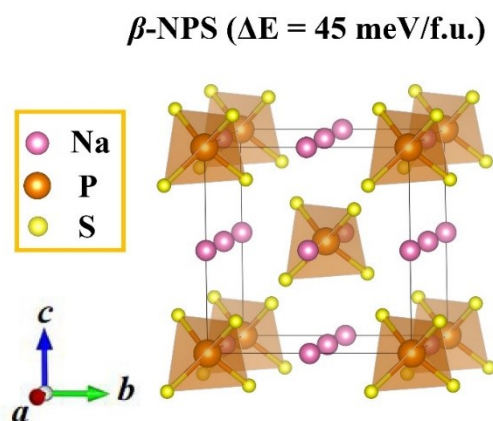

**Fig. S1** Crystal structures of  $\beta$ -NPS. The  $\Delta E$  is defined to be  $E(\beta\text{-NPS}) - E(\alpha\text{-NPS})$ .

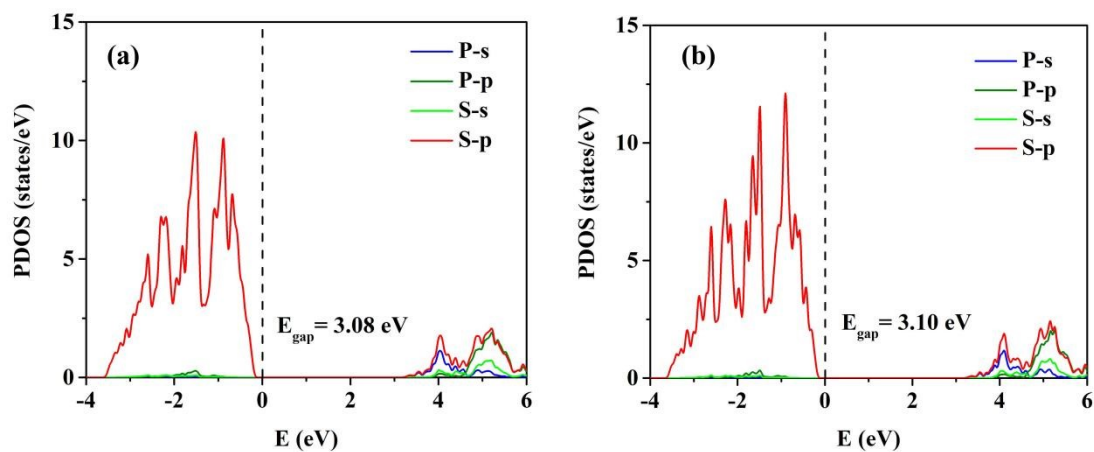

**Fig. S2** Projected density of states of the (a)  $\alpha$ -NPS and (b)  $\beta$ -NPS.

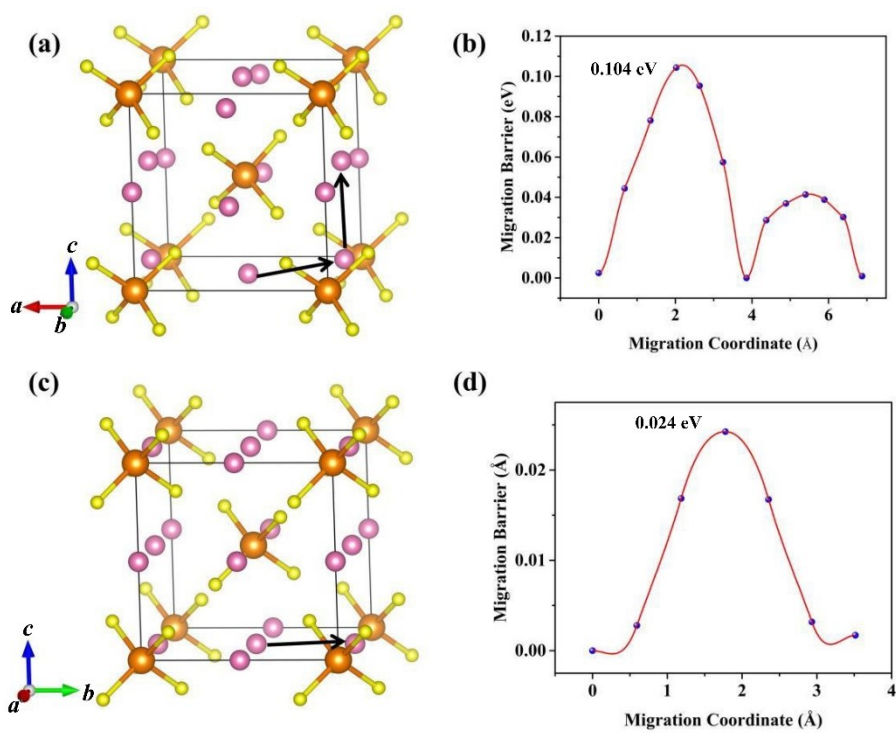

**Fig. S3** Na ions migration channels in (a)  $\alpha$ -NPS and (c)  $\beta$ -NPS. Migration barriers of Na ions in (b)  $\alpha$ -NPS and (d)  $\beta$ -NPS.

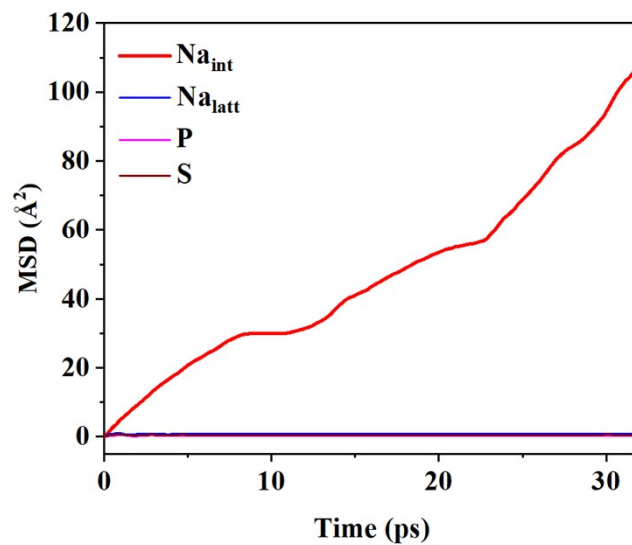

**Fig. S4** The MSD of interstitial Na, lattice Na, P and S atoms in  $\beta'$ -NPS simulated at 500 K for 32 ps.

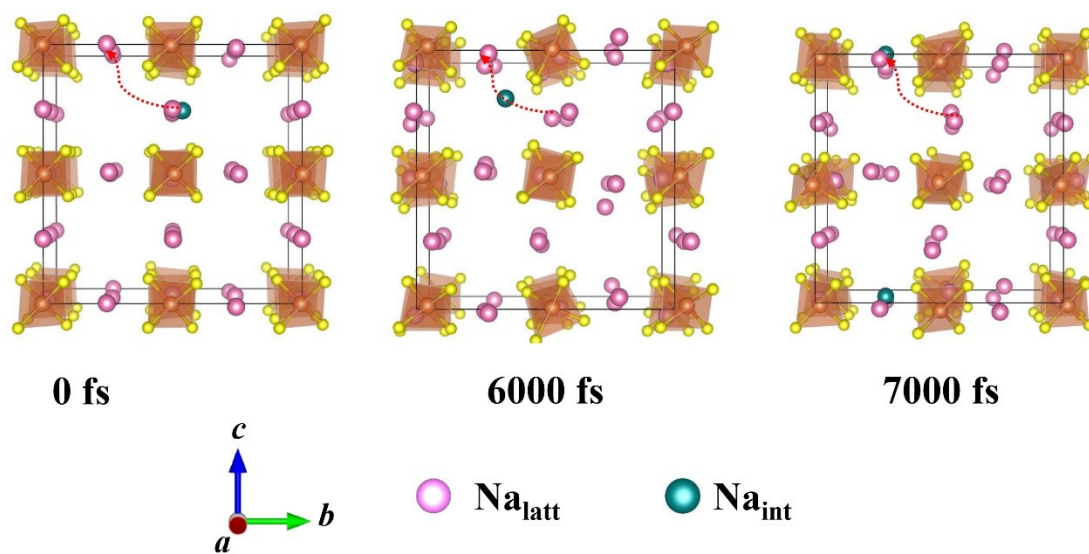

**Fig. S5** Snapshots for the migration of interstitial Na in the  $\beta'$ -NPS at 500 K for 7000 fs. The red arrows on snapshots show Na-ion migration direction.

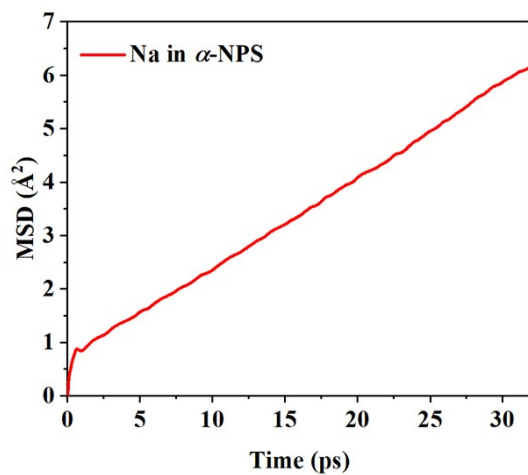

**Fig. S6** MSD of per one Na atom in  $\alpha$ -NPS simulated at 500 K for 32 ps.

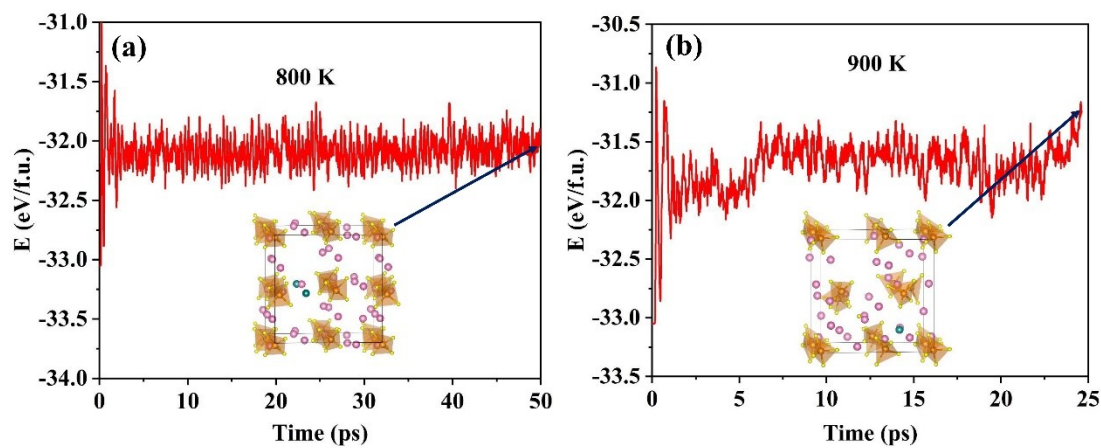

**Fig. S7** The evolutions of the potential energy of  $\beta'$ -NPS during AIMD simulations at (a) 800 K and (b) 900 K. The insets are final configuration of  $\beta'$ -NPS supercell obtained from AIMD simulations.

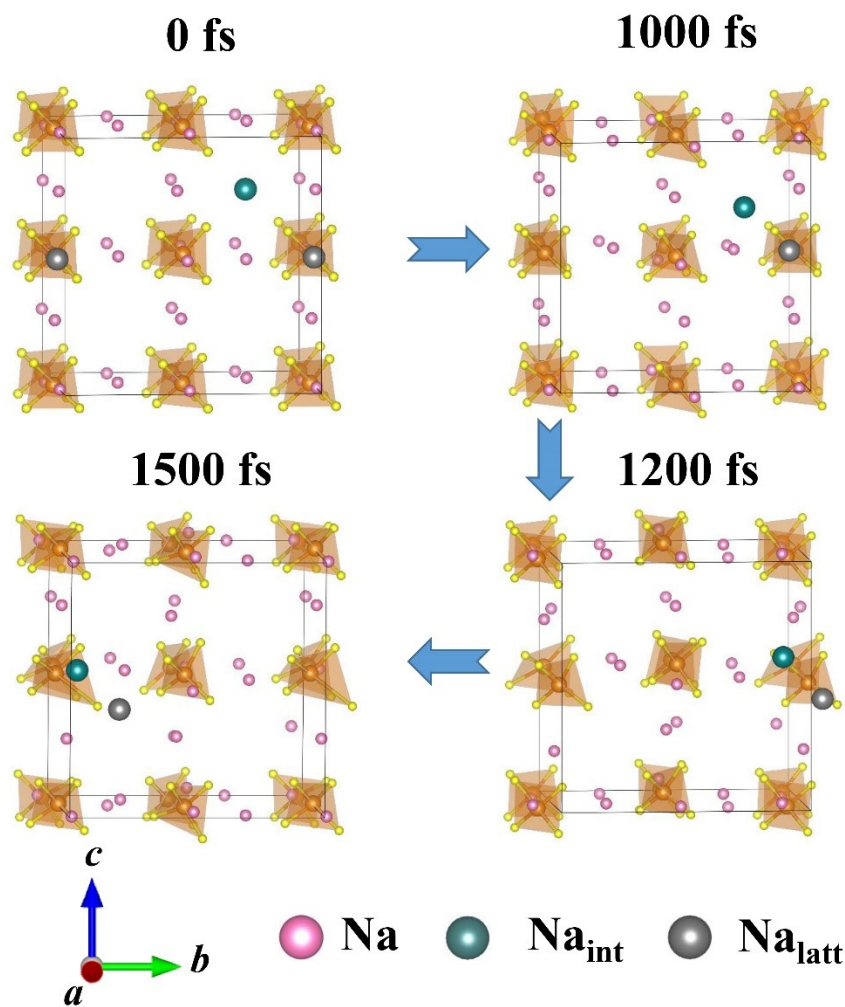

**Fig. S8** Snapshots for the kick-off migration of Na in the  $\beta'$ -NPS at 800 K for 1500 fs.

**Table S1.** Lattice constants of  $\beta'$ -,  $\alpha$ - and  $\beta$ -phases of NPS.

|               | Crystal system | Space group    |      | $a(\text{\AA})$    | $c(\text{\AA})$    |
|---------------|----------------|----------------|------|--------------------|--------------------|
| $\beta'$ -NPS | cubic          | $P\bar{4}3m$   |      | 6.802              | 6.802              |
| $\alpha$ -NPS | tetragonal     | $P4\bar{2}_1c$ | Cal. | 6.982              | 7.116              |
|               |                |                | Exp. | 6.962 <sup>a</sup> | 7.092 <sup>a</sup> |

|              |       |              |      |                    |                    |
|--------------|-------|--------------|------|--------------------|--------------------|
| $\beta$ -NPS | cubic | $I\bar{4}3m$ | Cal. | 7.012              | 7.012              |
|              |       |              | Exp. | 6.989 <sup>b</sup> | 6.989 <sup>b</sup> |

<sup>a</sup>Data come from Ref.1

<sup>b</sup>Data come from Ref.2

**Table S2.** Average bond lengths of Na-S and P-S in the NaS<sub>4</sub> and PS<sub>4</sub> tetrahedra of the NPS polymorphs.

|                       | $\alpha$ -NPS | $\beta'$ -NPS | $\beta$ -NPS |
|-----------------------|---------------|---------------|--------------|
| $d_{\text{Na-S}}$ (Å) | 2.913         | 2.779         | 2.863        |
| $d_{\text{P-S}}$ (Å)  | 2.067         | 2.068         | 2.070        |

**Table S3.** Calculated elastic constants (in GPa), Bulk modulus ( $B$ , in GPa), Young's modulus ( $E$ , in GPa), Shear modulus ( $G$ , in GPa) and  $B/G$  of  $\beta'$ -NPS and sodium metal<sup>3</sup>.

|          | $\beta'$ -NPS | Na   |
|----------|---------------|------|
| $C_{11}$ | 22.4          | 9.8  |
| $C_{12}$ | 3.3           | 7.9  |
| $C_{44}$ | 2.0           | 6.6  |
| $B$      | 9.7           | 8.5  |
| $E$      | 10.5          | 8.5  |
| $G$      | 4.0           | 3.2  |
| $B/G$    | 2.43          | 2.66 |

**Table S4.** Calculated phase equilibria for  $\beta'$ -NPS.

| Voltage range<br>vs Na <sup>+</sup> /Na (V) | $\Delta n_{\text{Na}}$ per formula | Phase equilibria                     |
|---------------------------------------------|------------------------------------|--------------------------------------|
| 0–0.62                                      | 8                                  | Na <sub>3</sub> P, Na <sub>2</sub> S |
| 0.62–0.81                                   | 6                                  | NaP, Na <sub>2</sub> S               |
| 0.81–1.17                                   | 5                                  | P, Na <sub>2</sub> S                 |

---

|           |    |                                                     |
|-----------|----|-----------------------------------------------------|
| 1.17–1.31 | 1  | Na <sub>2</sub> PS <sub>3</sub> , Na <sub>2</sub> S |
| 1.31–1.98 | 0  | Na <sub>3</sub> PS <sub>4</sub>                     |
| 1.98–2.25 | -1 | Na <sub>2</sub> PS <sub>3</sub> , S                 |
| 2.25–2.93 | -2 | NaPS <sub>3</sub> , S                               |
| >2.93     | -3 | P, S                                                |

---

## Reference

1. T. Famprikis, H. Bouyanfif, P. Canepa, M. Zbiri, J. A. Dawson, E. Suard, F. Fauth, H. Y. Playford, D. Dambournet, O. J. Borkiewicz, M. Courty, O. Clemens, J.-N. Chotard, J.-N. M. S. Islam and C. Masquelier, *Chem. Mater.*, 2021, **33**, 5652-5667.
2. M. Jansen and U. Henseler, *J. Solid State Chem.*, 1992, **99**, 110-119.
3. S. L. Shang, A. Saengdeejing, Z. G. Mei, D. E. Kim, H. Zhang, S. Ganeshan, Y. Wang, Z. K. Liu, *Comput. Mater. Sci.*, 2010, **48**, 813-826.
